# Supplementary material for: The critical role of neutrophil extracellular traps in pathological mineralization
Source: Research Square preprint supplement (doi:10.21203/rs.3.rs-2366909/v1), 2023-01-04
Supplement: Supplementary file 1 [file 8fa7eacb40665722b03d6d41.docx]

**The role of neutrophil extracellular traps in pathological mineralisation**

Mei-chen Wan†,1, Kai Jiao†,1, Yi-na Zhu†,1, Qian-qian Wan†,1, Long-zhang Niu1, Chen Lei1, Jing-han Song1, Wei-cheng Lu1, Hua-jie Liu1, Franklin Tay2, Li-na Niu1,*

† Equal contributors

1 The Fourth Military Medical University, Xi’an, Shaanxi, 710032, China

2 The Dental College of Georgia, Augusta University, Augusta, GA, 30912, USA

***Corresponding authors**: Dr. Li-na Niu, The Fourth Military Medical University, Xi’an, Shaanxi, China. Email: [niulina831013@126.com](mailto:niulina831013@126.com)

**Table of Contents**

**Supplementary Figures**

Supplementary Figure 1: Flow chart depicting the sequence of experiments conducted in the present study

Supplementary Figure 2: Characteristics of human dental calculus

Supplementary Figure 3: Characteristics of neutrophils which were isolated from human peripheral blood

Supplementary Figure 4: There was a tendency for NETs to reside on rough and loose surfaces

Supplementary Figure 5: Isolated neutrophils were stimulated or inhibited to release NETs

Supplementary Figure 6: NETs induce pathological mineralisation under physiological conditions

Supplementary Figure 7: NETs induced mineralisation of calcium carbonate *in vitro*

Supplementary Figure 8: DNase I could inhibit NET-induced mineralisation *in vitro* when co-cultured with immature bacteria

Supplementary Figure 9: DNase I failed to degrade the NETs in mature biofilms

Supplementary Figure 10: Existence of Z-form NETs in human dental calculus

Supplementary Figure 11: Existence of Z-form NETs in human pathological mineralisation

Supplementary Figure 12: Cerium chloride (CeCl3) converts B-from NETs to nuclease-resistant Z-form *in vitro*.

Supplementary Figure 13: Biocompatibility of chloroquine

**Supplementary Table**


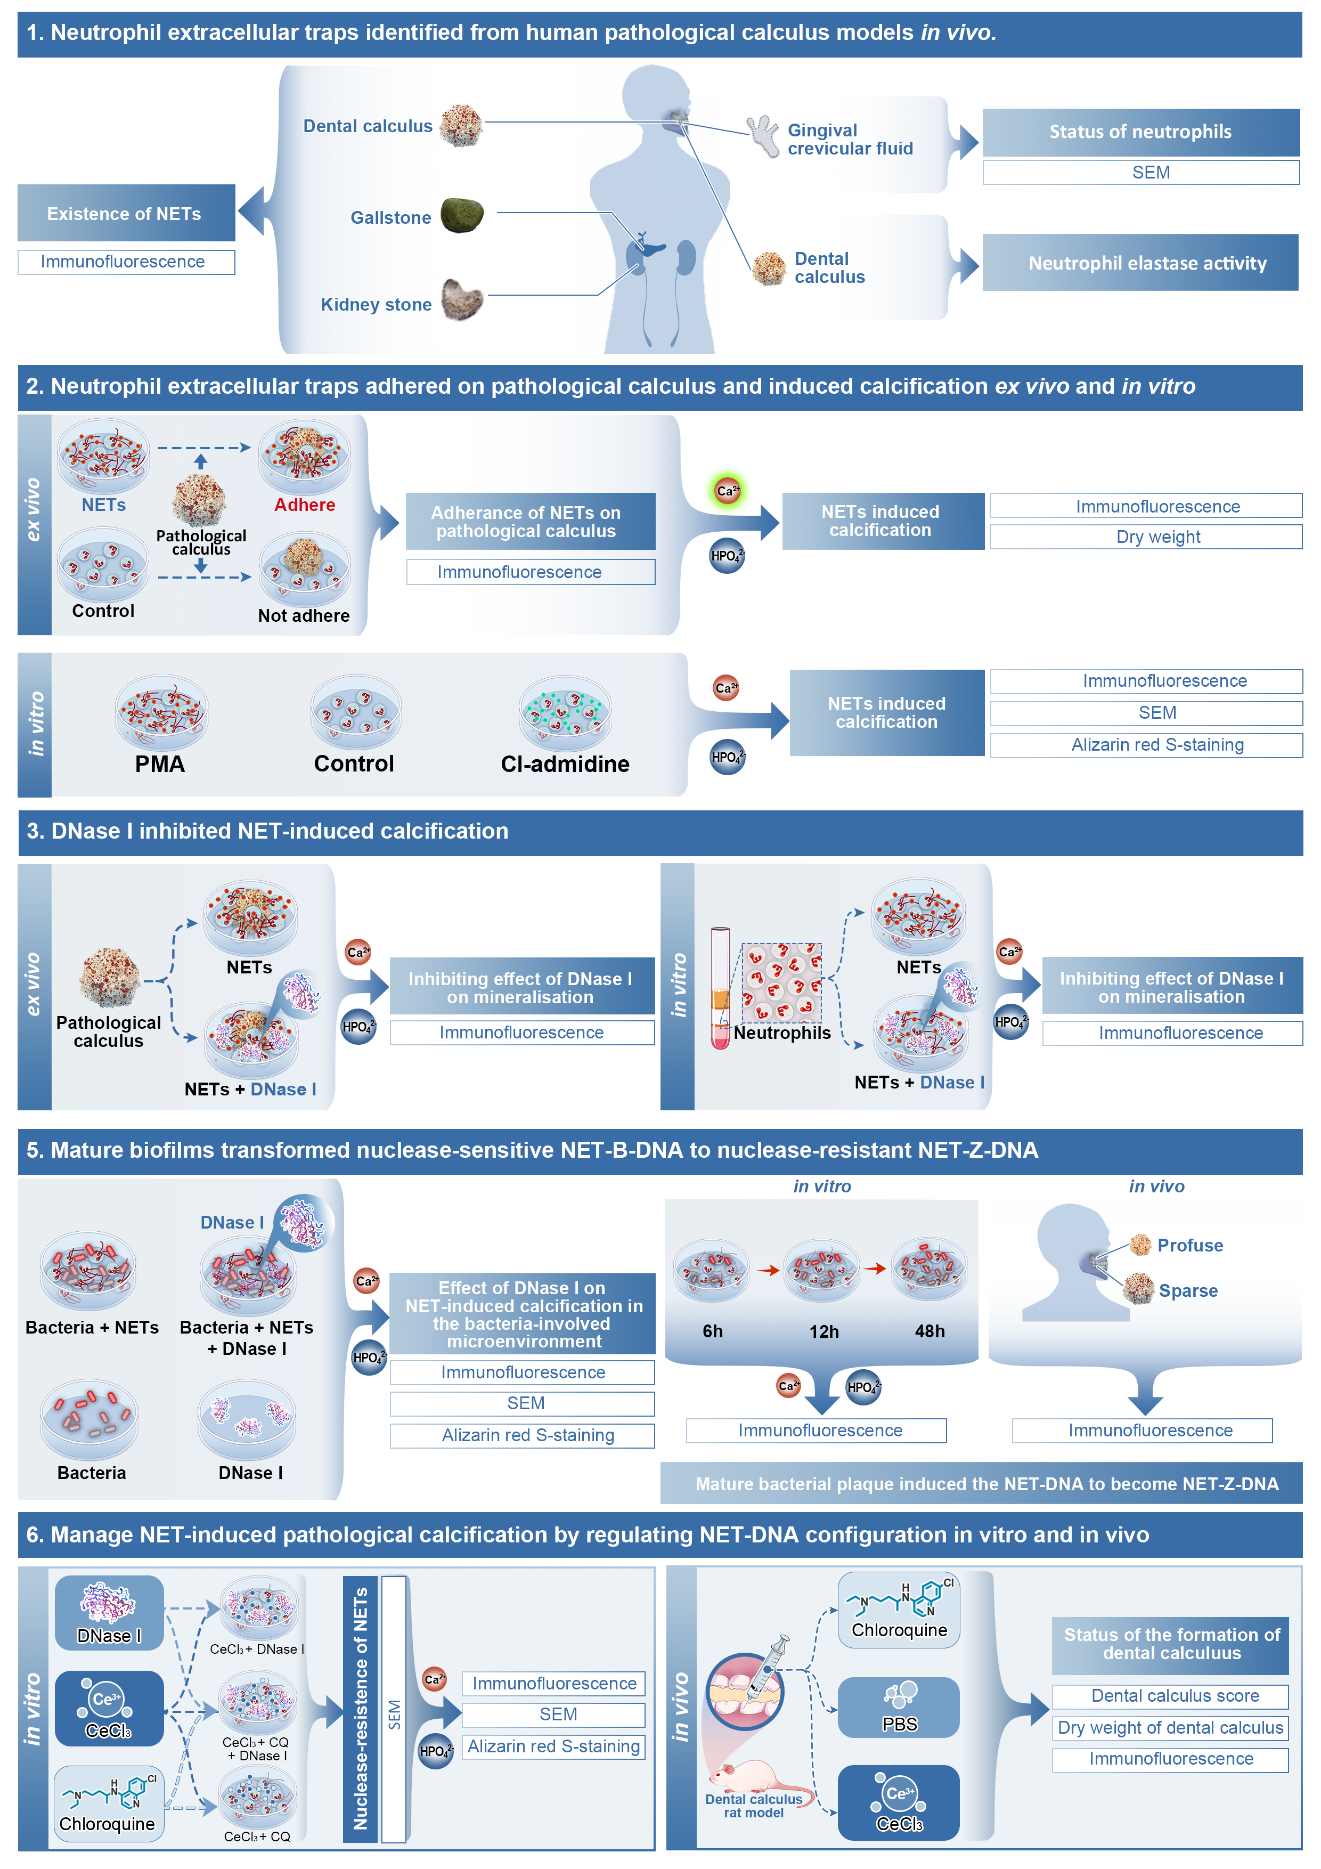


**Supplementary Figure 1.** Flow chart depicting the sequence of experiments conducted in the present study.


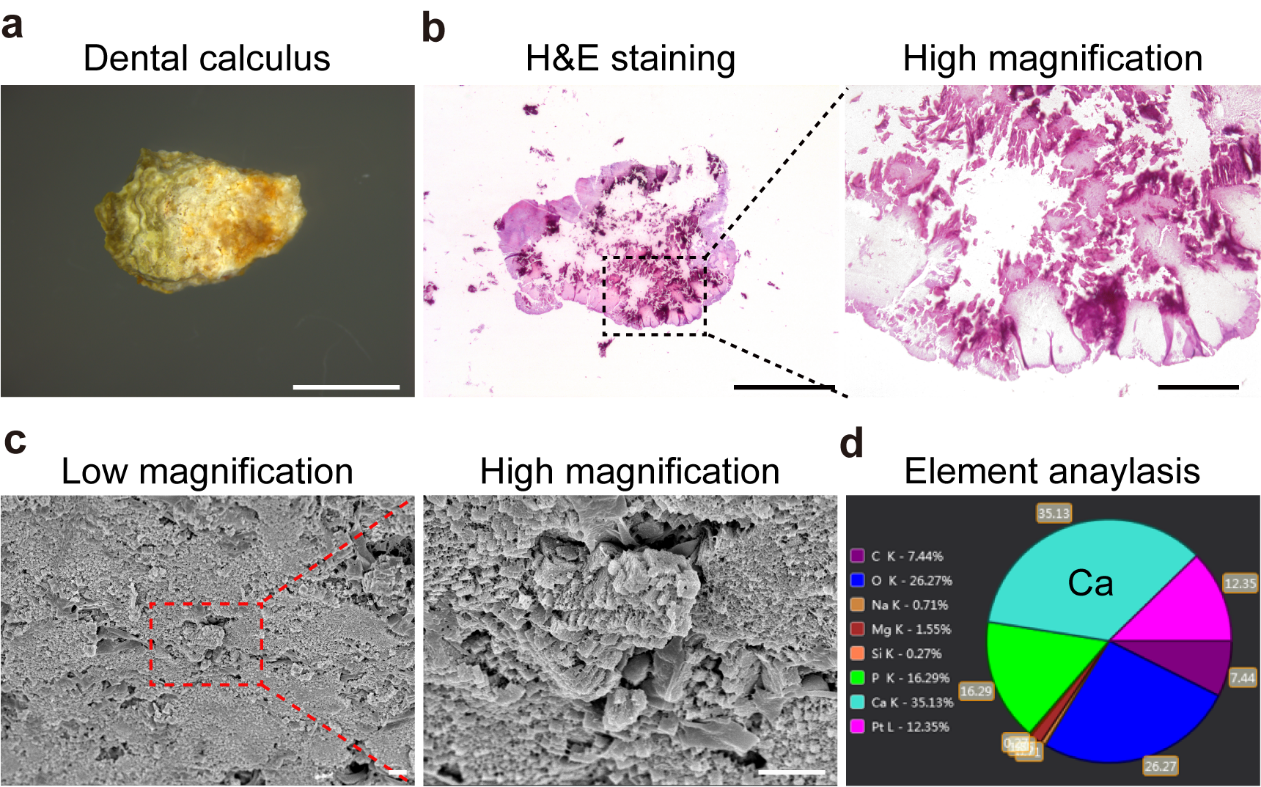


**Supplementary Figure 2. Characteristics of human dental calculus. a**,Stereomicroscope images of human dental calculus (scale bar, 1 mm). **b**, H&E staining of dental calculus (scale bar of low magnification: 1 mm; scale bar of high magnification: 200m). **c**,SEM images of dental calculus (scale bar, 1 m). **d**,Element analysis of dental calculus viaenergy dispersive X-ray spectroscopy.


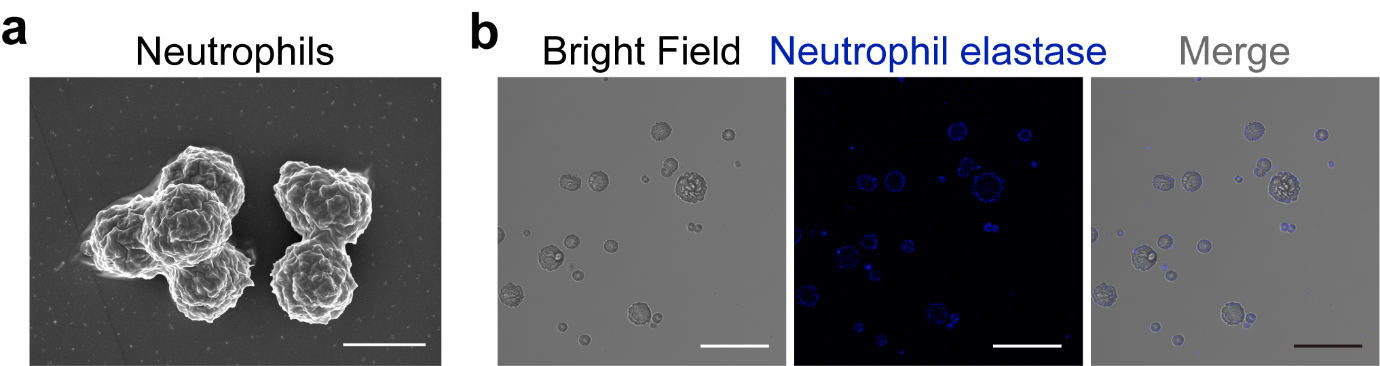


**Supplementary Figure 3. Characteristics of neutrophils which were isolated from human peripheral blood. a**,SEM image of neutrophils (scale bar, 5 m). **b**,CLSM images taken from isolated neutrophils (scale bar, 50 μm). Neutrophil elastase is the characteristic marker of neutrophils.


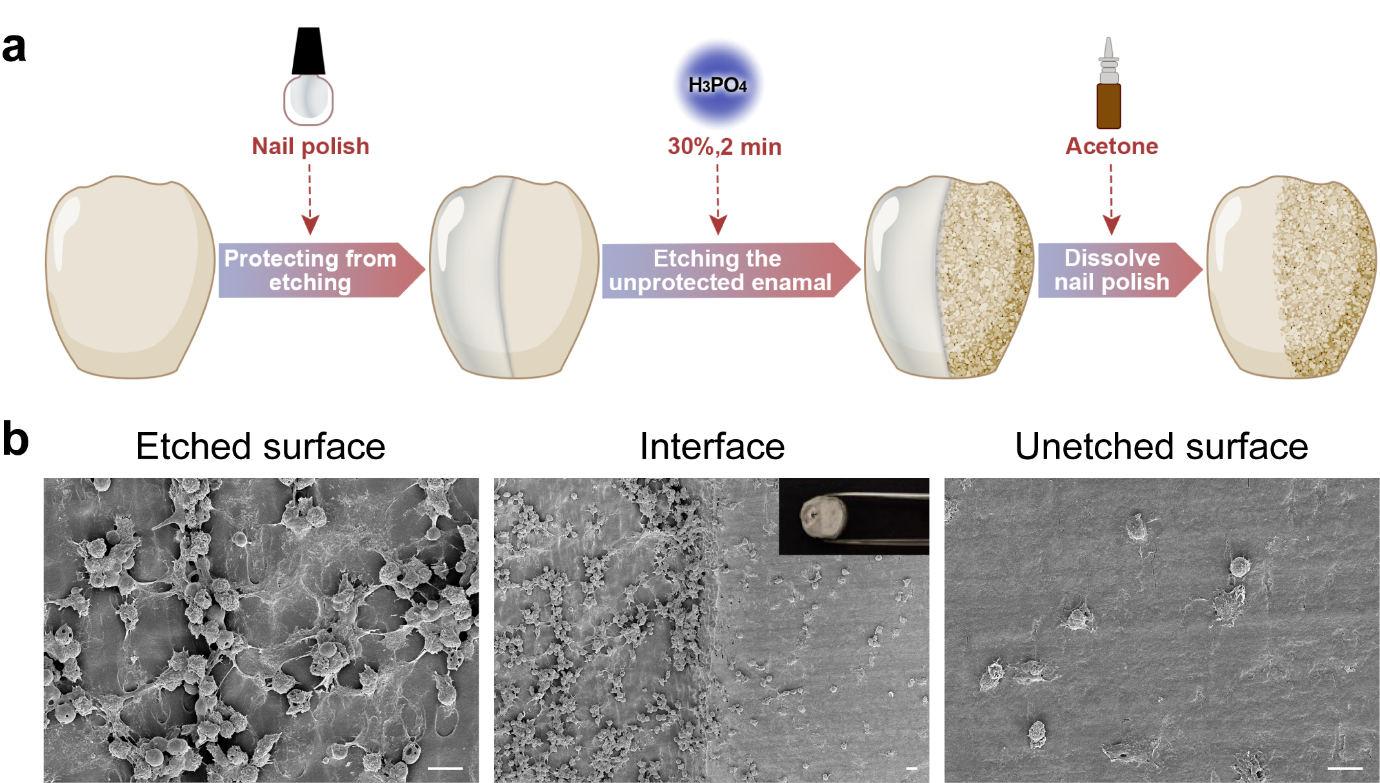


**Supplementary Figure 4. There was a tendency for NETs to reside on rough and loose surfaces. a**, Schematic depicting the design of the *ex vivo* experiments. Enamel was sectioned into slices. Nail varnish was used to cover one-half of an enamel slice to prevent that half from being acid-etched. The non-varnished part of the slice was etched with 30% (v/v) phosphoric acid for 2 minutes. The acid-etched part of enamel slice was used as the experimental group, to simulate the rough and loose surface of pathological calcified nodules. The enamel slice was treated with acetone to dissolve the nail varnish and then autoclaved. Neutrophils were seeded to release NETs on the surface of the prepared enamel slice. **b**, SEM images of the enamel surface that was seeded with NET-releasing neutrophils (scale bar, 10 m). There was a tendency for the NETs to reside on the rough and loose surfaces that resembled the surfaces of pathological calcified nodules.


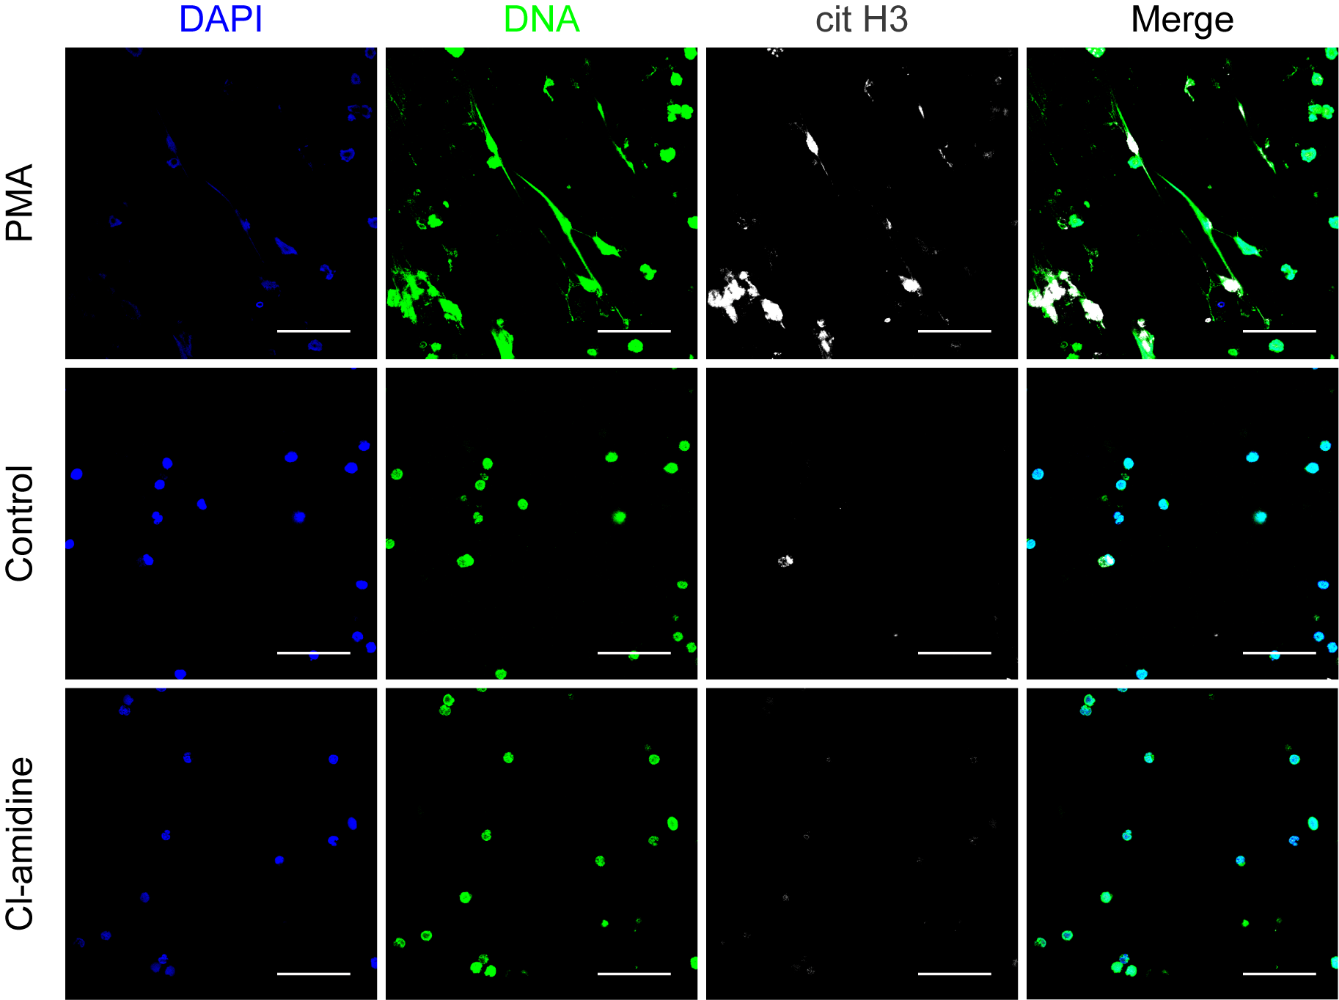
 **Supplementary Figure 5. Isolated neutrophils were stimulated or inhibited to release NETs.** CLSM images of isolated neutrophils (scale bar, 50 m). The neutrophils were treated with phorbol 12-myristate 13-acetate (PMA; 50 nM) to stimulate the release of NETs. Cl-amidine (200 M) was used as inhibitors of NET release by the neutrophils. In the group treated with PMA, signals derived from cell nuclei were weak because of the extrusion of nucleosome. Wire-like and reticulate extracellular DNA, which was co-localized with cit H3, was obvious in PMA group.


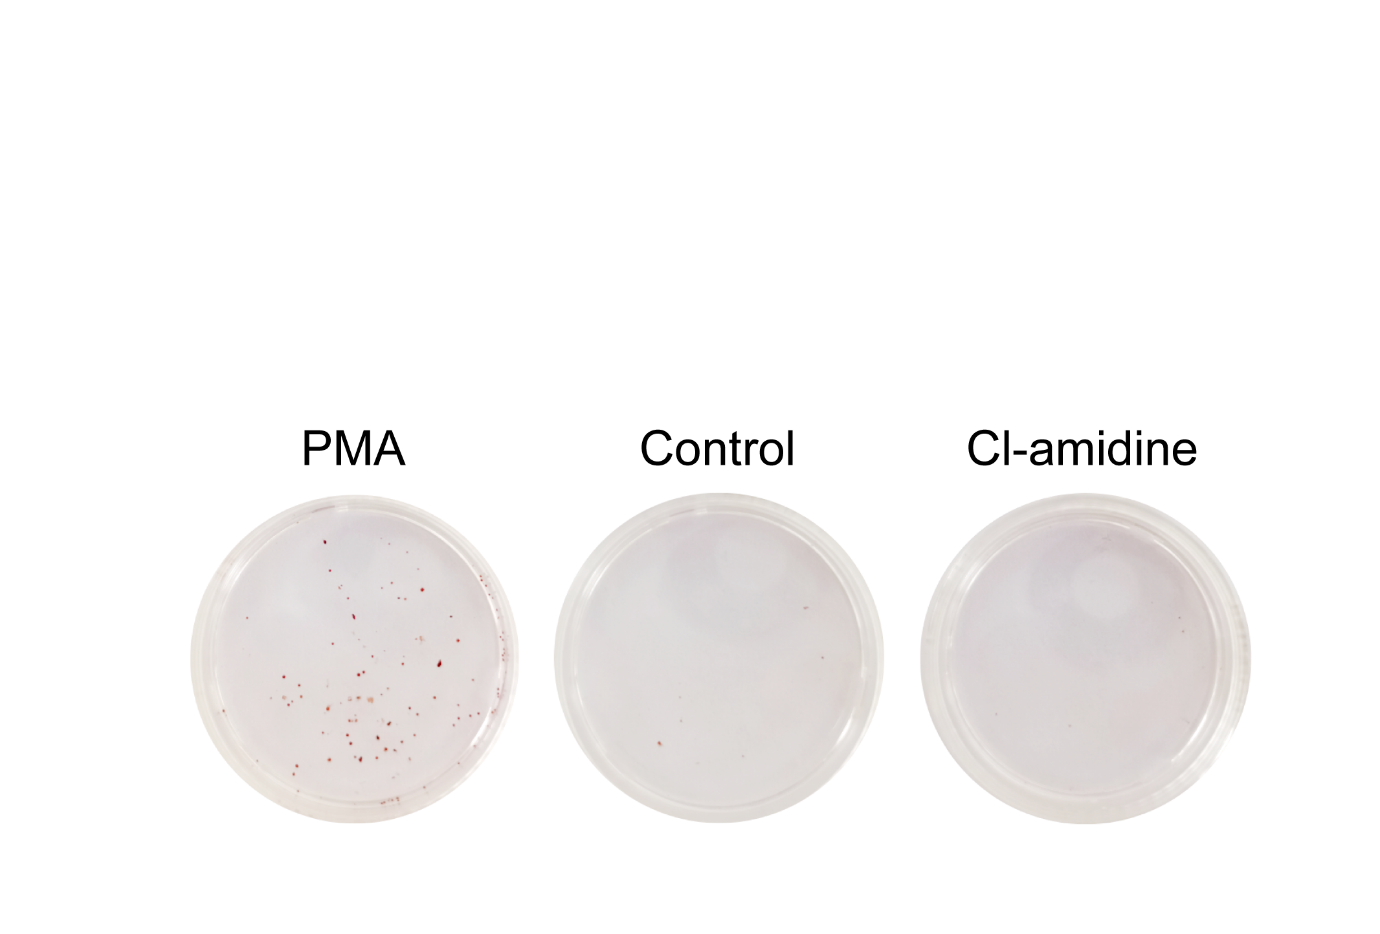


**Supplementary Figure 6. NETs induce pathological mineralisation under physiological conditions.** Alizarin red S staining of neutrophils (fixed with paraformaldehyde) cultured with artificial saliva for 7 days.


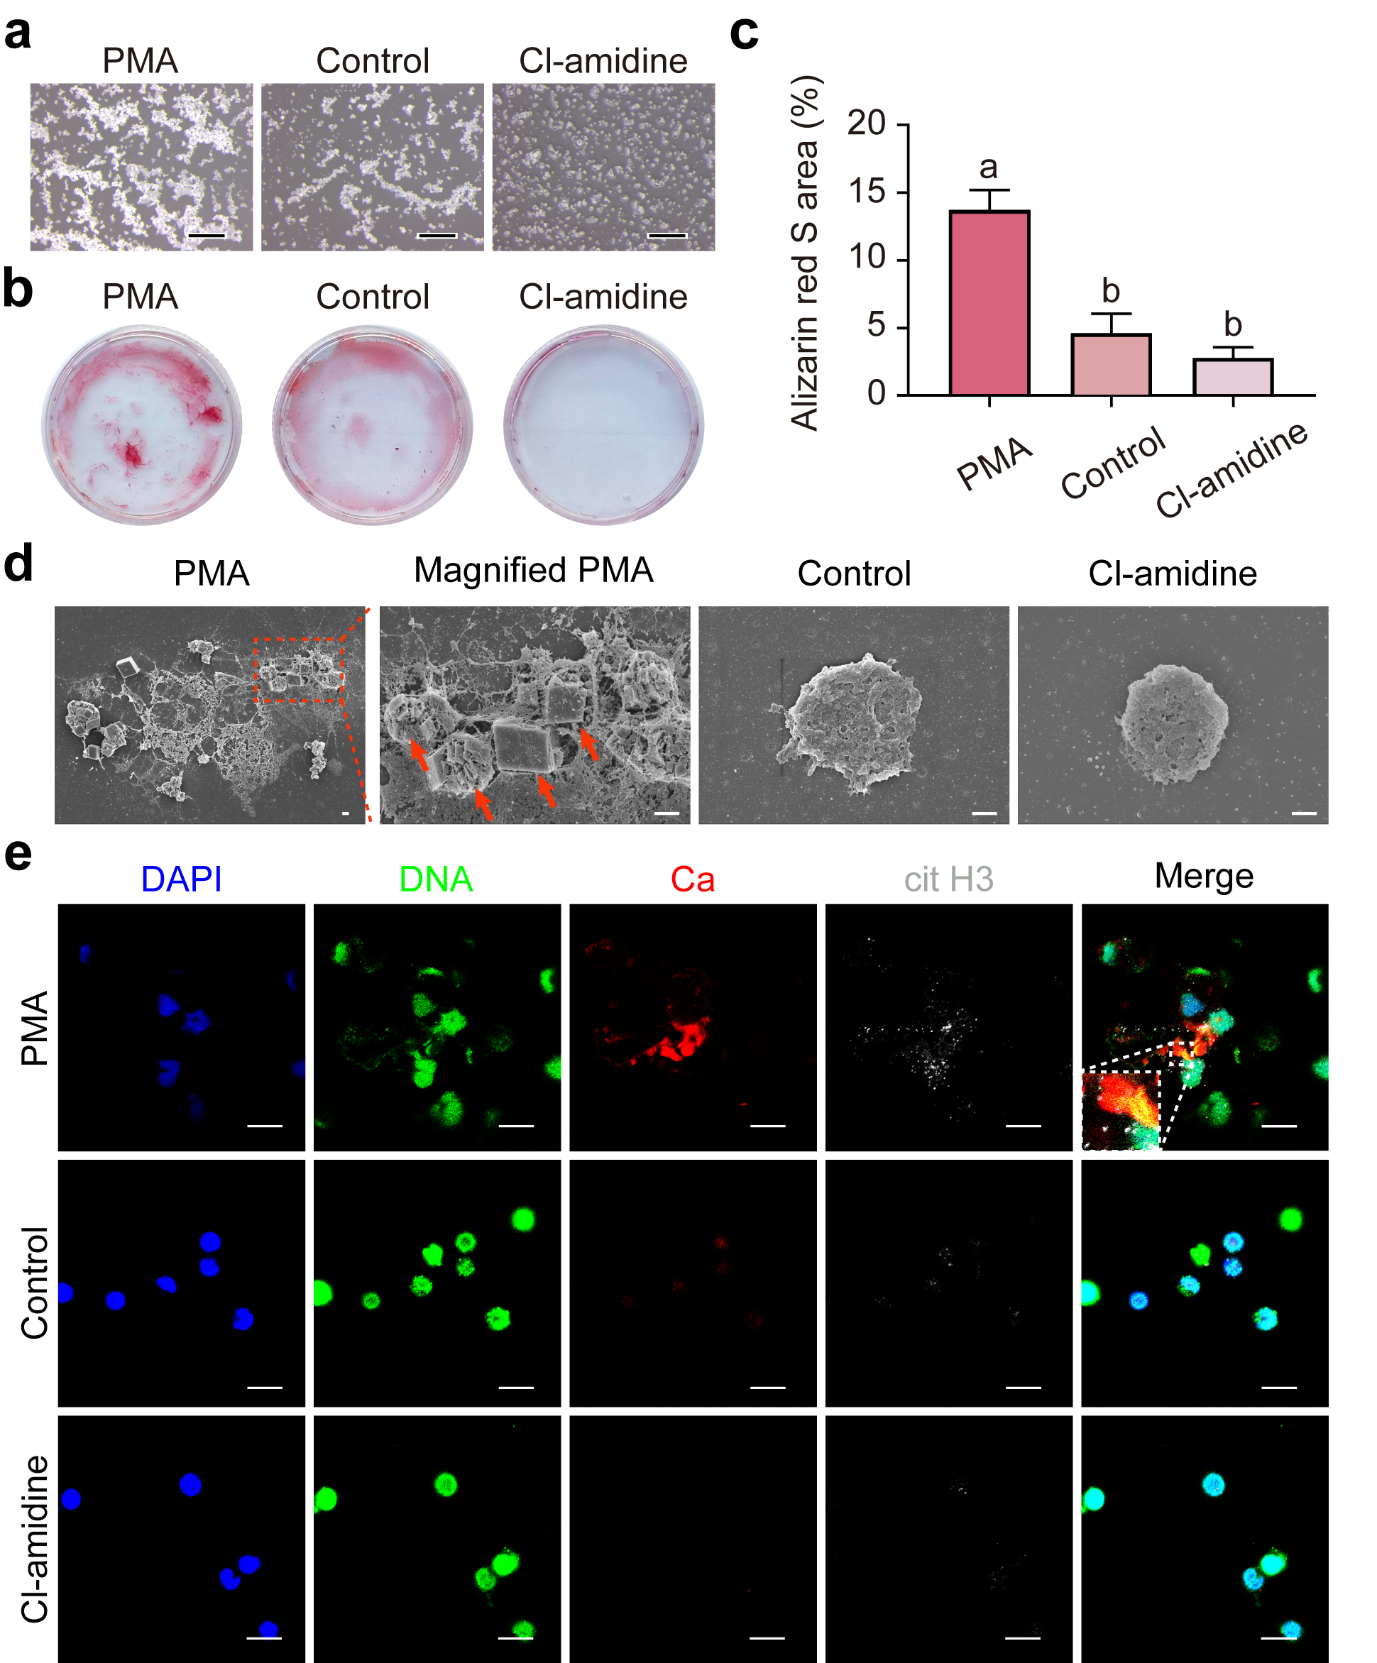


**Supplementary Figure 7. NETs induced mineralisation** **of calcium carbonate *in vitro*. a**, Stereomicroscope images of NET-induced calcium carbonate mineralisation after 7 days (scale bar, 200 m).**b**,Representative Alizarin red S-stainedimages of NET-induced calcium carbonate mineralisation *in vitro*. **c**,Semi-quantitative analysis of Alizarin red S staining in (**b**). Means ± standard deviations (*n* = 6, *p* < 0.0001). The percentage of Alizarin Red S area of PMA group was significantly higher than that of control (*p* < 0.0001) and Cl-amidine group (*p* < 0.0001). **d**, Cubiform calcium carbonate (red arrow) could be identified around the reticulate NETs in the PMA group (scale bar, 1m). **e**,Co-localization of calcified nodules, DNA and cit H3 in the high magnification images of the white rectangle (scale bar, 10m).
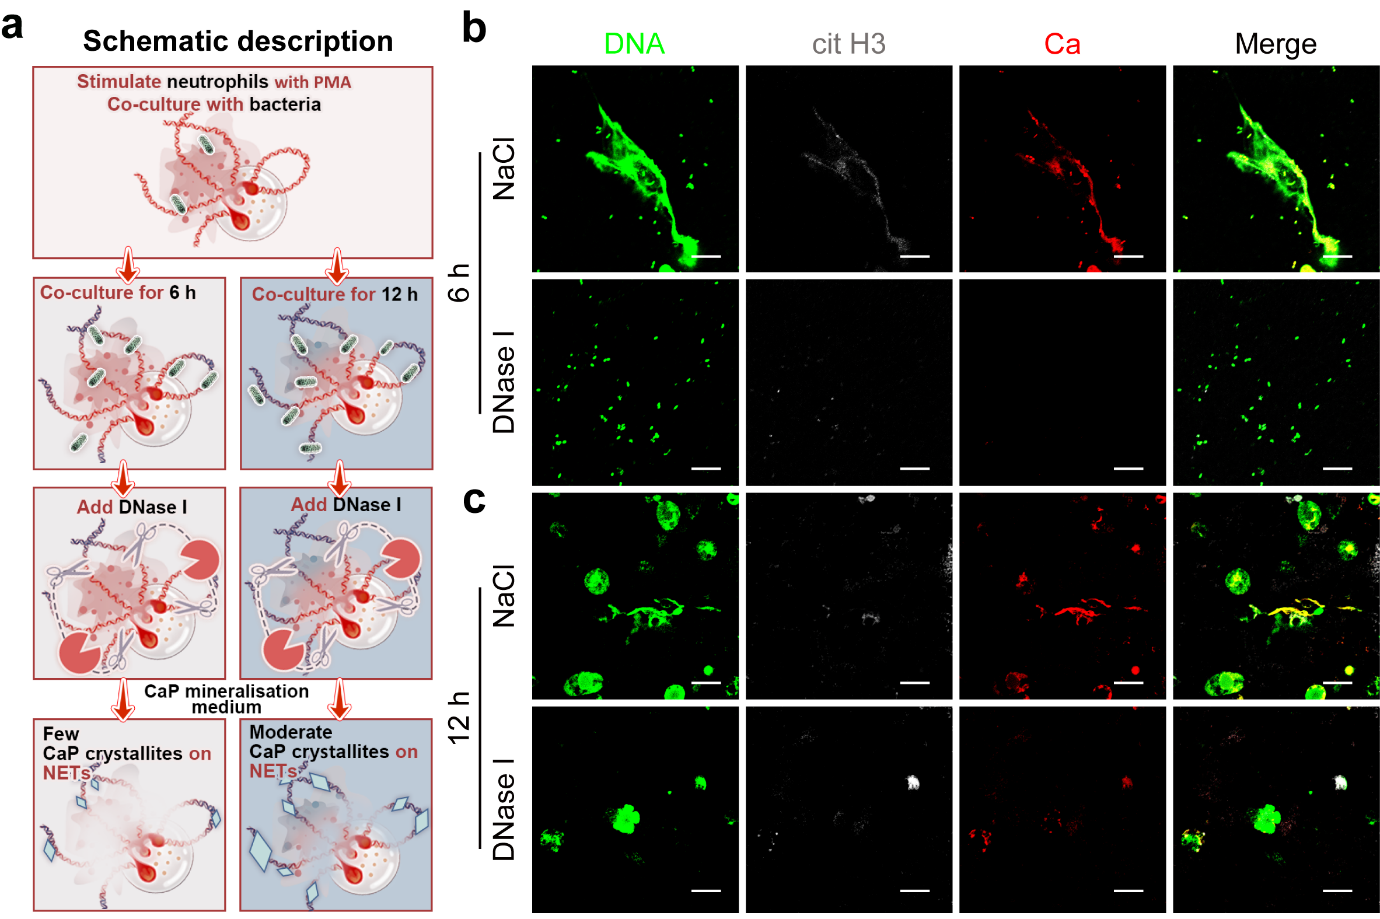


**Supplementary Figure 8.** **DNase I could inhibit NET-induced mineralisation** ***in vitro* when co-cultured with immature bacteria.** **a**, Schematic illustrating the design of the *in vitro* model.After co-culturing the NETs with *Streptococcus mutans* for 6 h, signals representative of Ca, reticular DNA and cit H3 was barely detected in the DNase I treated subgroup (**b**). Conversely, in the group that co-cultured with bacteria for 12 h, part of the NET markers and the associated calcified nodules still existed despite the use of DNase I (**c**) (scale bar, 10 m).

­­


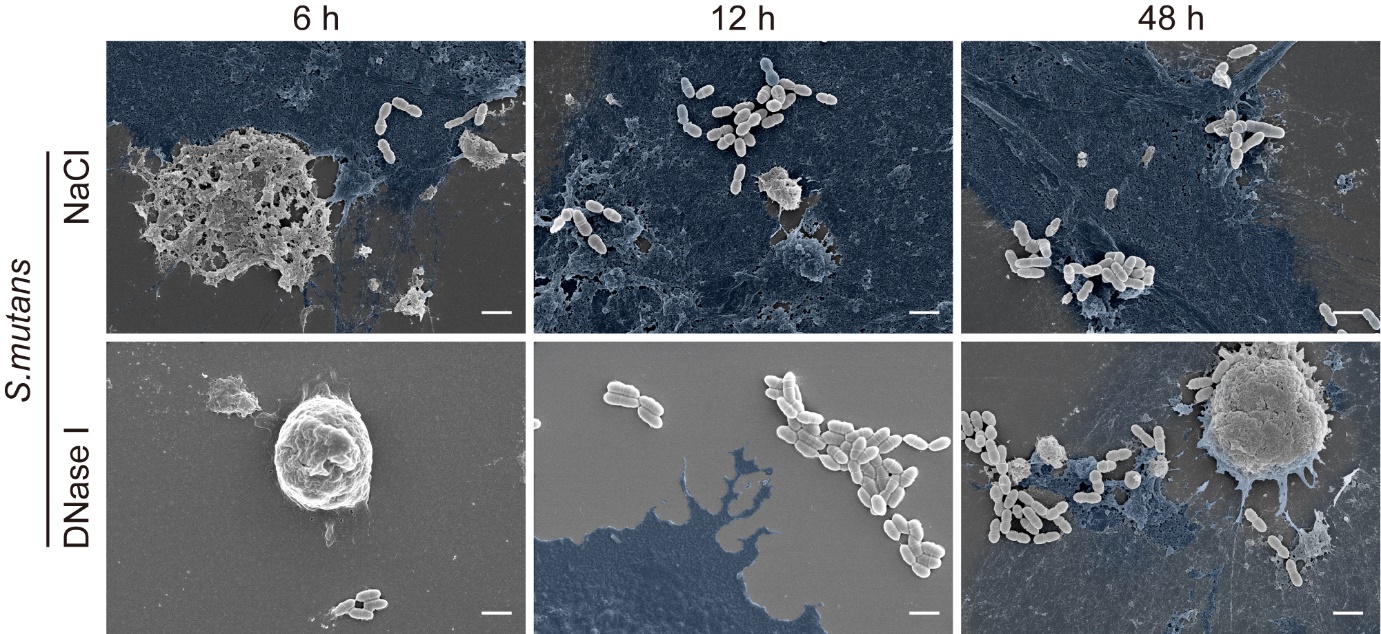


**Supplementary Figure 9. DNase I failed to degrade the NETs in mature biofilms.** Obvious reticular structure could be detected in the NaCl group (control group) after co-culturing the NETs (pseudo-colored for clarification) with *S. mutans* for 6 h, 12 h and 48 h. DNase I could degrade almost all the NETs after co-culturing the NETs with *S. mutans* for 6 h. In the 12 h group, a little of undegraded NETs were observed after the treatment of DNase I. Nevertheless, the effect of DNase I on the clearance of NETs was not significant after they were co-cultured with *S. mutans* for 48 h (scale bar, 1 μm).


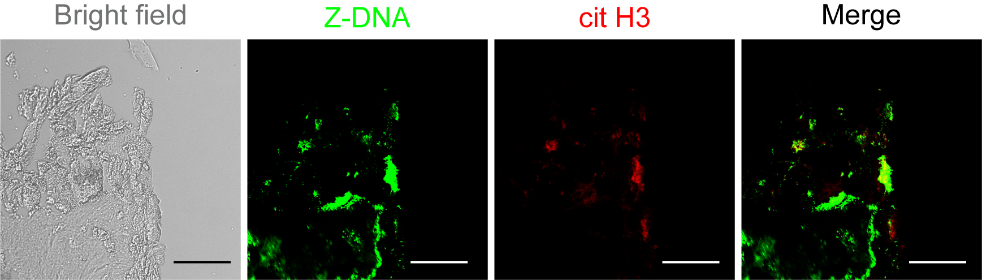


**Supplementary Figure 10. Existence of Z-form NETs in human dental calculus.** Scattered Z-form DNA and co-localized cit H3 could be found in the calcified human dental calculus nodules (scale bar, 50 μm).


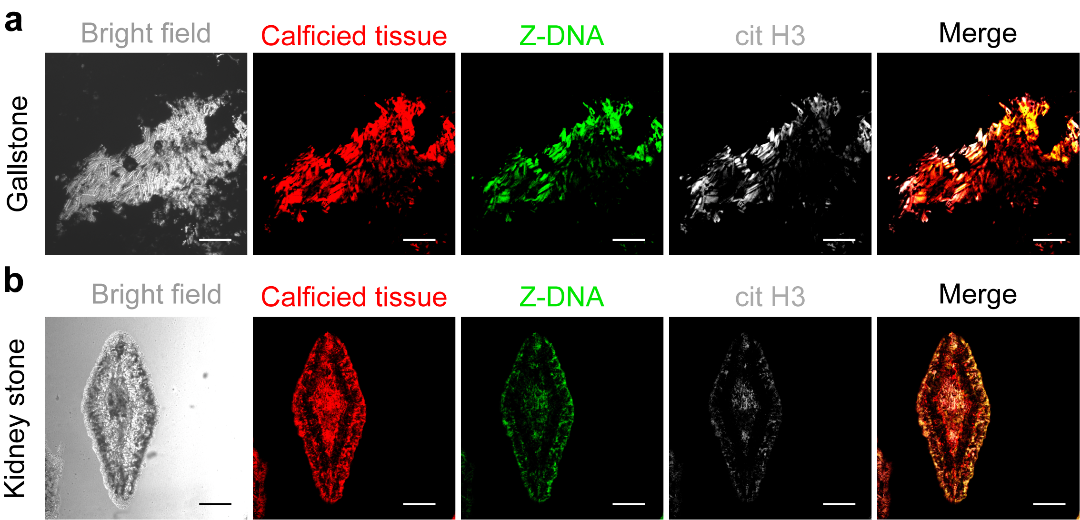


**Supplementary Figure 11. Existence of Z-form NETs in human pathological mineralisation.** Scattered Z-form DNA and co-localized cit H3 could be found in human gallstones (**a**) and kidney stones (**b**) (scale bar, 200 μm).


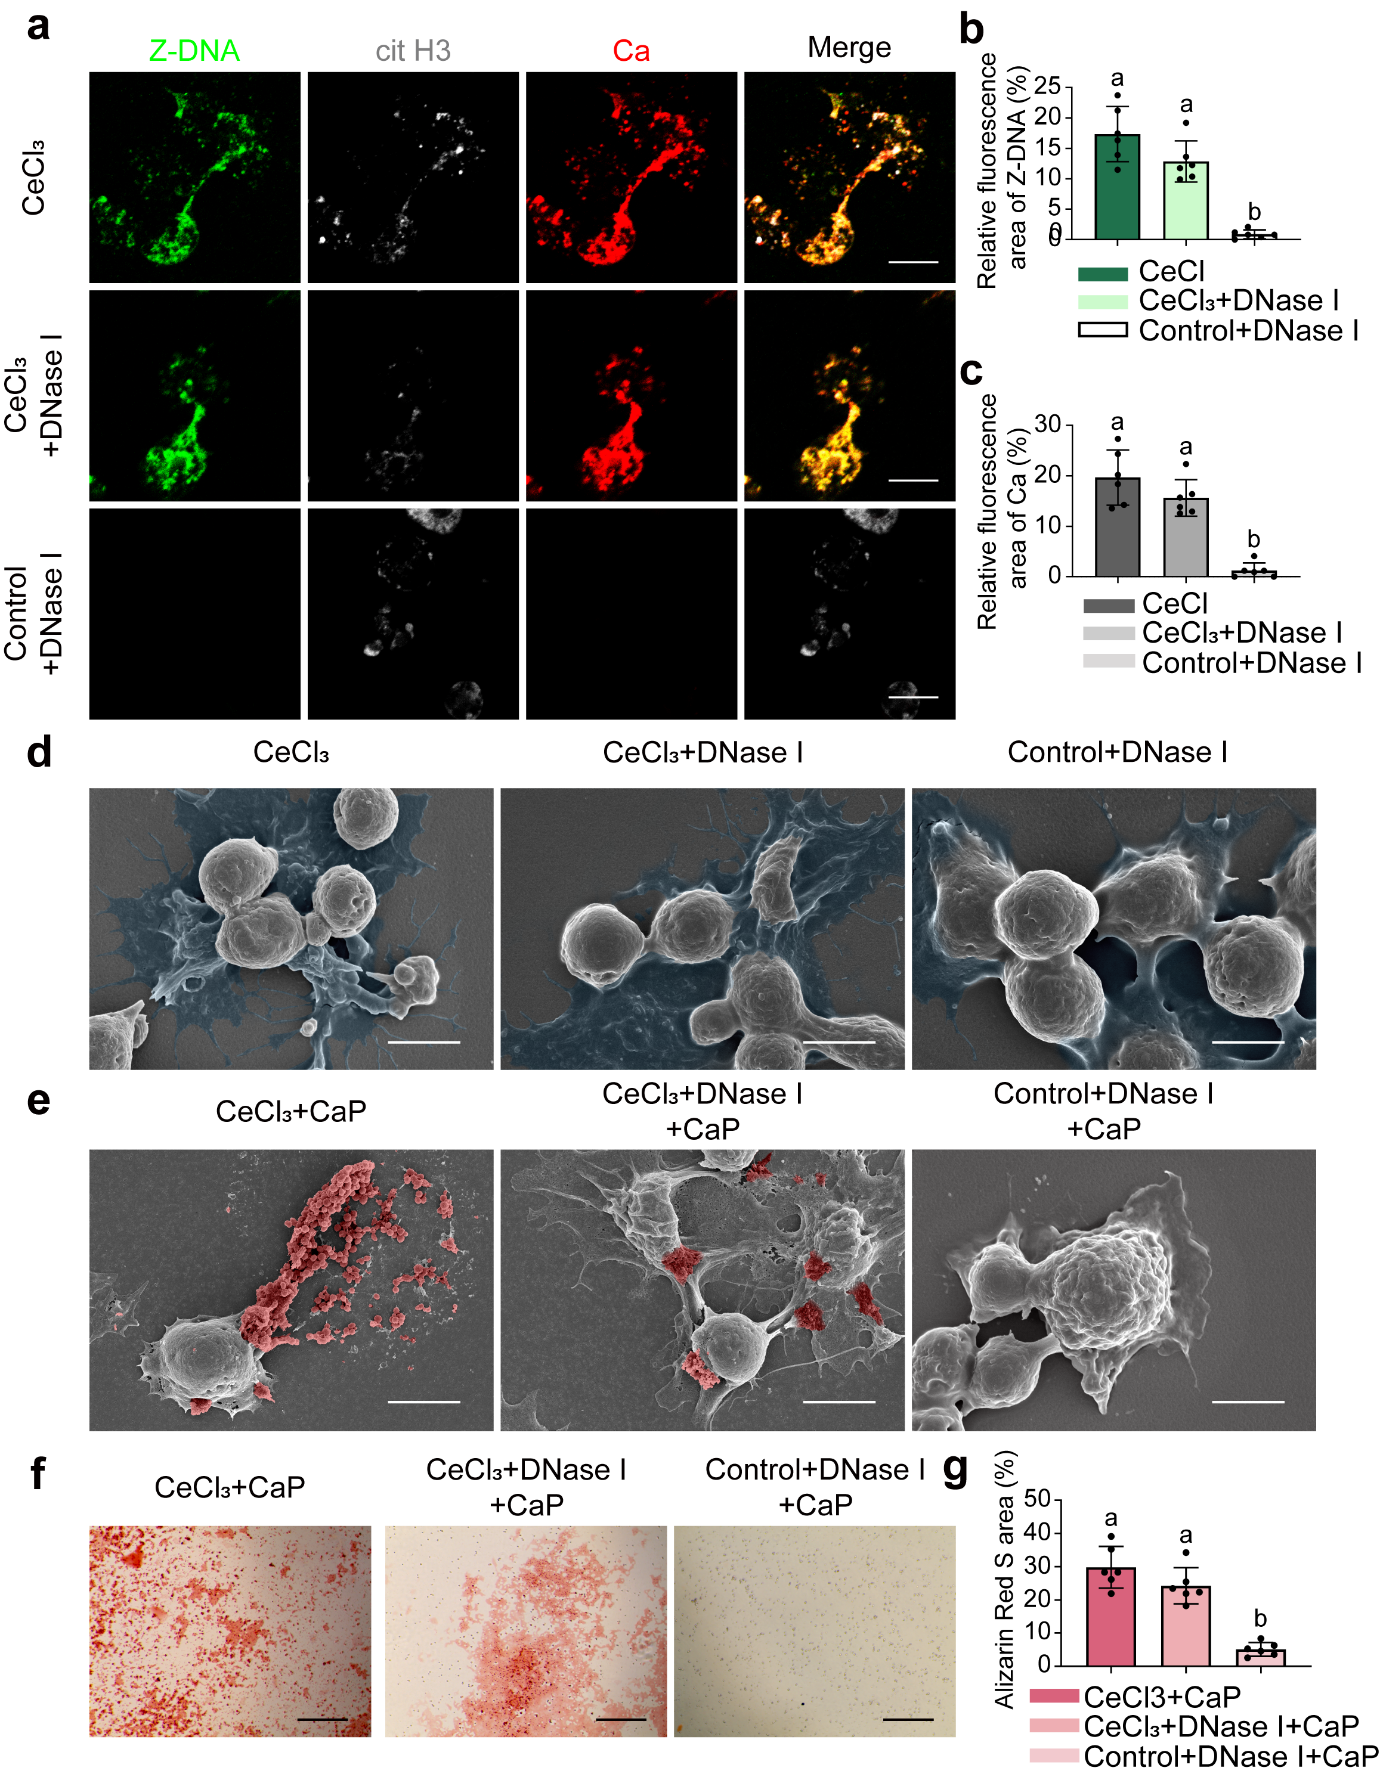


**Supplementary Figure 12.** **Cerium chloride (CeCl3) converts B-from NETs to nuclease-resistant Z-form *in vitro*.** Cerium chloride (CeCl3) was used to stimulate the transformation of NET-B-DNA into NET-Z-DNA. DNase I was used to evaluate the nuclease-resistance of NETs. The effects of DNase I on mineralisation were subsequently investigated. **a**, CLSM images of transformation of NET configuration and its related pathological mineralisation (scale bar, 10 m). Co-localization of calcified nodules and the Z-form NET markers (Z-DNA and cit H3) was identified in the CeCl3 group, with or without the use of DNase I. Conversely, NETs were easily degraded by DNase I in the group without the use of CeCl3; the calcified nodules in this group were barely visible. **b**,Semi-quantitative analysis of the relative fluorescence area of Z-DNA in (**a**). The expression of Z-DNA in CeCl3 groups with or without use of DNase I was significantly higher than that in the control group. Means ± standard deviations (*n* = 6, *p* < 0.0001). **c**,Semi-quantitative analysis of the relative fluorescence area of Ca in (**a**). The signals of Ca in CeCl3 groups with or without use of DNase I was significantly higher than that in the control group. Means ± standard deviations (*n* = 6, *p* < 0.0001). **d**, SEM images of the Z-form of NETs and their resistance to nuclease (scale bar, 10 m). NETs were pseudo-colored for clarification. The reticular NETs were difficult to be removed by DNase I in the CeCl3-treated group. **e**, SEM images of the Z-form of NETs and their associated mineralisation (scale bar, 10 m). Calcified nodules were pseudo-colored for clarification. The Z-form of NETs in the CeCl3-treated group were heavily mineralised. Microscopical calcified clusters were identified in the CeCl3 and DNase I-treated group. **f**, Alizarin red S-stained images of the mineralisation associated with the Z-form of NETs (scale bar, 100 m). Positively-stained nodules were extensive in the CeCl3-treated group irrespective of DNase I treatment, which was consistent with the SEM data. **g**, Semi-quantitative analysis of Alizarin red S staining in (**f**). Means ± standard deviations (*n* = 6, *p* < 0.0001).


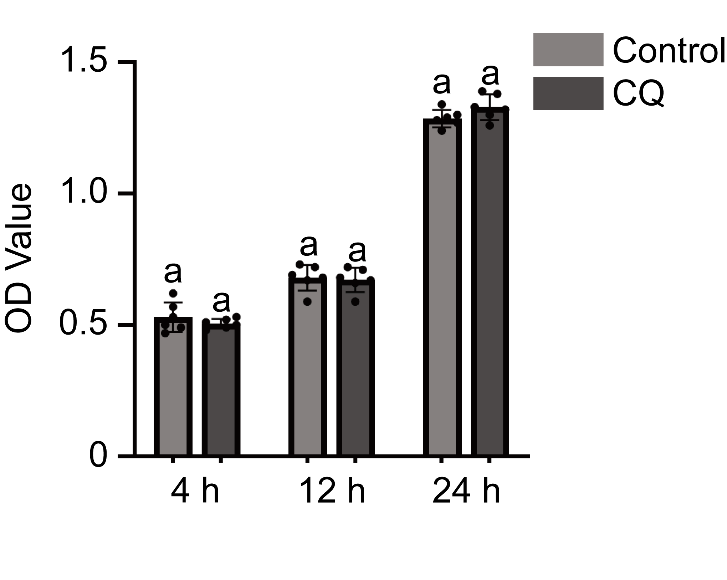


**Supplementary Figure 13. Biocompatibility of chloroquine.** CCK-8 assay testing cell viability of human gingival fibroblast under the stimulation of chroloquine (*n* = 6).

**Supplementary Table 1**

| **Reagent or resource** | **Source** | **Identifier** |
| --- | --- | --- |
| **Andibodies** |  |  |
| Rabbit Anti-Neutrophil Elastase | Abcam | Ab131260 |
| Rabbit Anti-Z-DNA [Z22] | Absolute Antibodies | Ab00783-23.0 |
| Murine Anti-Z-DNA [Z22] | Absolute Antibodies | Ab00783-3.0 |
| Murine Anti-B-DNA | Abcam | ab27156 |
| Rabbit Anti-Citrullinated histone H3 | Abcam | Ab1503 |
| Goat Anti-Rabbit IgG H&L (Alexa Fluor® 647) | Abcam | Ab150079 |
| Goat Anti-Rabbit IgG H&L (Alexa Fluor® 405) | Abcam | ab175652 |
| Goat Anti-Rabbit IgG H&L (FITC) | Abcam | ab6717 |
| Goat Anti-Mouse IgG H&L (Alexa Fluor® 405) | Abcam | ab175660 |
| Goat Anti-Mouse IgG H&L (FITC) | Abcam | ab6785 |
| **Bacterial strains** |  |  |
| S. mutans strain UA159 | ATCC | 700610 |
| **Chemicals** |  |  |
| SYTOXTM Green | Thermo Fisher | S7020 |
| DAPI | Sigma Merck | 28718-90-3 |
| Alizarin Red S | Sigma-Aldrich | A5533 |
| Lipopolysaccharide | Sigma-Aldrich | L2630 |
| DNase I | Solarbio | 9003-98-9 |
| Phorbol 12-myristate 13-acetate | Sigma-Aldrich | 16561-29-8 |
| Cl-amidine | MedChemExpress | HY-100574 |
| Cerium Chloride | Aladdin | 7790-86-5 |
| Chloroquine | Aladdin | 54-05-7 |
